# Supplementary material for: Identification of miRNAs in Response to Sweet Potato Weevil (Cylas formicarius) Infection by sRNA Sequencing
Source: MDPI journal article supplement (doi:10.3390/genes13060981), 2022-05-30
Supplement: s1 [file s1]

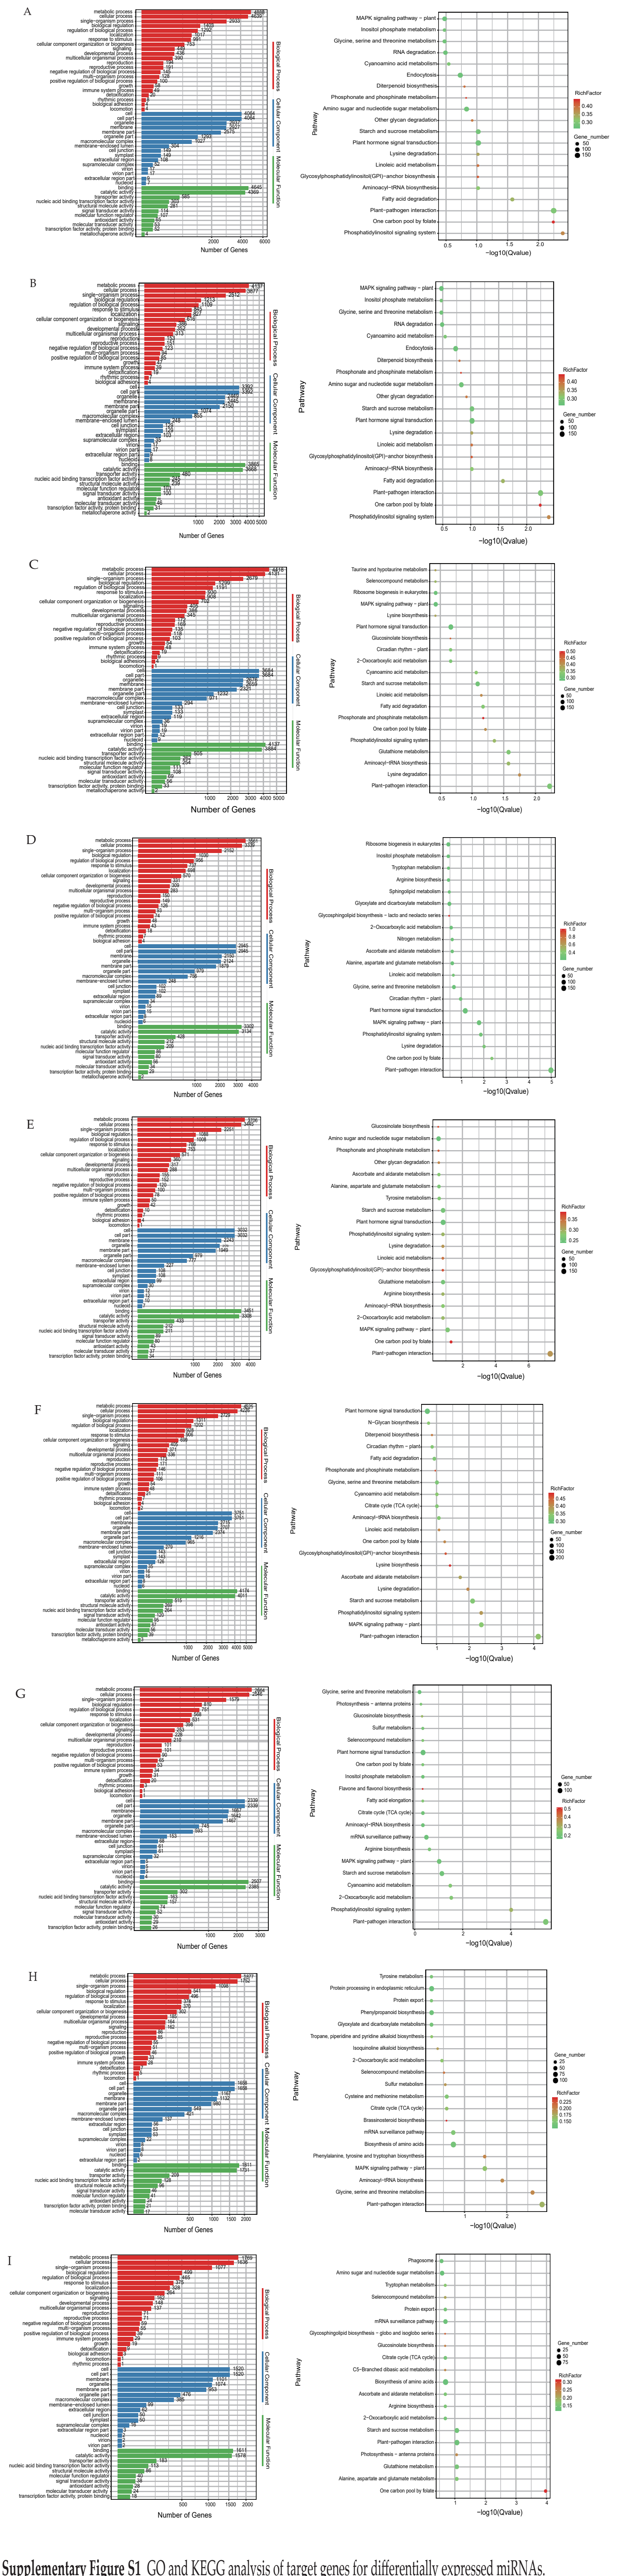

**Supplementary Figure S1** GO and KEGG analysis of target genes for differentially expressed miRNAs.  
( A ) E0 vs E24 , Left: GO analysis; Right: KEGG analysis; ( B ) E0 vs E48 , Left: GO analysis; Right: KEGG analysis;  
( C ) E0 vs E72 , Left: GO analysis; Right: KEGG analysis; ( D ) G0 vs G24 , Left: GO analysis; Right: KEGG analysis;  
( E ) G0 vs G48 , Left: GO analysis; Right: KEGG analysis; ( F ) G0 vs G72 , Left: GO analysis; Right: KEGG analysis;  
( G ) E24 vs G24 , Left: GO analysis; Right: KEGG analysis; ( H ) E48 vs G48 , Left: GO analysis; Right: KEGG analysis;  
( I ) E72 vs G72 , Left: GO analysis; Right: KEGG analysis.
